# Supplementary material for: Amplifiers of selection for the Moran process with both Birth-death and death-Birth updating
Source: PubMed Central journal article supplement (PMC11006194; doi:10.1371/journal.pcbi.1012008), 2024-03-29
Supplement: pcbi.1012008.s002.pdf [file pcbi.1012008.s002.pdf]

## Review response

Reviewer #1: This is a very well written article that presents a graph structure that amplifies the selection for Bd and dB updating. The result is relatively counterintuitive, because, as the authors present in the first part of the manuscript, there are many indications that such a structure should not exist.

Overall, the proof is sound and the presentation is excellent.

**Answer:** [We thank the reviewer for nice words.](#)

Reviewer #2: This manuscript considers the question of whether a single graph can be an amplifier of selection for both Birth-death and death-Birth updating. This is a very natural question, to the extent that it is surprising no one has investigated it before.

The manuscript presents both negative and positive results. On the negative side, it proves results that help explain why such a simultaneous amplifier would be difficult to find (and has not been found previously). On the positive side, it provides a recipe for constructing such an amplifier, and proves its amplification properties.

The manuscript is straightforward and clear. I can find no issues with the proofs. Overall I think this is a positive contribution. I have only a few minor comments:

**Answer:** We thank the reviewer for a positive assessment and for constructive suggestions.

Author Summary: “Interestingly, none of the spatial structures that work for one updating seem to work for the other one.” I would rephrase to something like “so far, no spatial structures have been found that...”

**Answer:** We rephrased as suggested.

Main Text:

\*I do not think a research paper needs “spoiler alerts”

**Answer:** As suggested, we omitted that phrase.

\*Theorem 1 is presented as a “black box” in the main text, but it is really quite easy to understand: For dB, neutral fixation probability is directly proportional to (weighted) degree, while for Bd, it is inversely proportional. A vertex cannot be above average in both degree and inverse degree. Unless I am missing something, this is the entire content of Theorem 1. Of course, the rigorous proof from the AM-HM inequality is still valuable, but the intuition is very straightforward and can be presented in the main text.

**Answer:** As suggested, we included this proof idea.

SI:

\*The content of Lemma 1 in some sense goes all the way back to Antal, Redner, & Sood (“Evolutionary Dynamics on Degree Heterogeneous Graphs”, PRL, 2006). The extension to weighted graphs has already been noted; see, for example, Eq. (95) of Allen & McAvoy (“A mathematical formalism for natural selection with arbitrary spatial and genetic structure”, JMB, 2018).

**Answer:** Thank you for pointing out those relevant references, we now cite both of them.

\*It may be helpful to repeat the definition of gamma before the statement of Theorem 2. In fact, the proof of Theorem 2 starts by developing formulae for these gammas, but these could be presented before the theorem statement.

**Answer:** As suggested we recalled the definition of gammas.

\*When the proof of Theorem 2 turns to dB, it gives expressions for  $p_{\{Bd,r\}^+}$  and  $p_{\{Bd,r\}^-}$ . I believe these should be dB rather than Bd.

**Answer:** Thank you, we fixed those typos.

\*Provide a reference for Markov's inequality

**Answer:** We added a reference.

\*The paragraph after the proof of Lemma 6 does not seem necessary in light of Theorem 1 (which has already been proven by this point).

**Answer:** We omitted part of the paragraph that refers to Theorem 1.

\*In the proof of Lemma 10, the periods after conditions 1, 2, and 3 are a bit awkward; consider removing these.

**Answer:** We rephrased condition 1 such that the period there looks a bit less awkward.

Reviewer #3: The authors explore evolutionary processes occurring on structured populations, considering two types of stochastic processes, the Birth-death and the death-Birth processes. The authors focus on the ability of networks to amplify selection of beneficial mutations under the two processes. They identify that the graph topologies previously inspected did not amplify selection for both processes at the same time. In this context, they proposed to do two things: 1) building an argument of why simultaneous amplification is not commonly observed; 2) building a network topology that is an exception to this.

To address the first point, the authors provide 3 negative results. The first empirically shows that instances of known amplifiers of selection for each of the dynamics are not amplifiers for the other. The second result shows that under neutral selection, fixation starting from one particular node of a network can never be amplified for both dynamics (Theorem 1). The third result shows that it is not possible for a node of a network to hold an amplified initial forward bias under both dynamics (Theorem 2).

To address the second point, the authors conceptualize a graph that is an amplifier of beneficial mutations under both dynamics, and prove under which conditions they do it (Theorems 3 and 4). This graph is robust, modular and does the simultaneously amplification for reasonable areas of the fitness parameter space. Due to the modularity of the constructed graph, it can be easily altered to incorporate stronger Bd- or dB- amplifiers which may be found in the future.

Overall, I consider the paper to provide a significant contribution to the study of evolutionary processes under population structure. Its main strength is the several fronts used to build the main argument of the paper which are provided with exact mathematical formalism and formalized as theorems. Particularly, negative results 2 and 3, and the positive result are entirely supported by the proofs provided in the supplementary material (Theorems 1-4 and auxiliary Lemmas). Most lemmas/theorems provided are quite general (e.g., Theorems 1 and 2). The only exception is the first negative result, which is provided without an extensive exploration of previously found amplifying topologies.

Taking this into consideration, I recommend only minor revisions as stated below.

**Answer:** We thank the reviewer for kind words and for great constructive feedback.

Minor revisions needed in main manuscript:

Fig. 2 – This figure needs improvement in visualization. Colors used for K11 and D11 are too similar, and markers used for those two cases completely overlap in figures b) and c). Size of markers on b) and c) is too small and should be increased for better visualization. Alternatively, you may want to consider redoing both plots as  $\rho_r/\rho_{\{K11,r\}}$  in order to avoid the confusion between the curves of D11 and K11 and because, ultimately, you compare  $\rho_r$  under each topology with  $\rho_{\{K11,r\}}$ .

**Answer:** Thank you for those suggestions. We made the markers larger (and sparser) such that the figure is hopefully clearer even when some markers overlap a lot (this is pretty much inevitable, since the graph D11 is an extremely weak amplifier)

Fig. 2 - The caption states “suppressor D11”, shouldn’t it be “amplifier D11” instead?

**Answer:** Yes, we fixed this typo.

Theorems 1 and 2 – “Then either” seems to imply only one of the three statements can be true.

I would suggest rephrasing as “Then at least one of the following is true:...” to avoid ambiguity.  
**Answer:** We avoided this ambiguity as suggested.

Page 7, line 219 – The temperature of a node  $u$  is introduced as the sum of the reciprocal of the degree of all neighbours of  $u$ .

- It should be instead the sum of  $w(v,u)/\deg(v)$ . This is only equal to  $1/\deg(v)$  when graphs are unweighted.

- The sum should be over “ $v:(v,u)\in E$ ” and say it explicitly in the equation to avoid confusion, instead of explaining later only in text.

- The notation  $\deg(v)=\sum_u w(v,u)$  should be defined beforehand, as it is not defined anywhere in the main manuscript, only in the supplementary material.

**Answer:** We fixed the definition and stated it more explicitly as suggested.

Fig. 3 caption – “is a Fan graph on  $f$  nodes.” should be “is a Fan graph with  $f$  nodes.”

**Answer:** We fixed this as suggested.

Fig. 4 – In a), I suggest representing the other edge attached to  $u$  and  $v$  for exactness of figure. In the caption, it is said “a mutant who has fixated over  $A^{\{dB\}}$ ”, where it should be  $A^{\{Bd\}}$ .

**Answer:** We adapted the figure to represent the situation better. And we fixed the typo.

Revisions needed in Supplementary Information:

**Answer:** Thank you for all the comments below.

Page 1- First paragraph – In “ $\deg(u)=\sum\dots$ ”, the sum should be over  $v:(u,v)\in E$ .

**Answer:** Fixed.

Page 2 – Lemmas 2 and 3 – For consistency, “ $N$ ” (not “ $n$ ”) should have been used for the size of the graph.

**Answer:** Fixed.

Page 2 – Theorems 1 and 2 – Similarly to what I suggested for the main text, “Then either” seems to imply only one of the three statements can be true. I would suggest rephrasing as “Then at least one of the following is true:...” to avoid ambiguity.

**Answer:** Fixed.

Page 2 – third paragraph from end – In “the right-hand side”, it should say instead “the left-hand side” or, alternatively, “the product above”.

**Answer:** Fixed (we use “the product”).

Page 4 – First equations should be  $\rho_{\{dB,r\}}^{+}=\dots$  and  $\rho_{\{dB,r\}}^{-}=\dots$ . They should have factors of  $1/N$  instead of factors  $1/F$ .

**Answer:** Fixed.

Page 4 - What is meant by “For the equality to occur everywhere”?

**Answer:** We fixed this to “For the equality to occur in the first step” .

Page 5 - In Proof of Lemma 6, it is said “later we prove”, but it has been proved before.

**Answer:** We omitted this sentence.

Page 5 – Right before stating Lemma 7, you have “spread the the other graph”, whereas it should be “spread to the other graph”

**Answer:** Fixed.

Page 5 – Lemma 7 doesn’t read easily. I would suggest rephrasing to have the equation at the end: “... and a randomly placed mutant in  $A_{\{N,\gamma\}}$ , mutants become extinct or fixate on their part of  $A_{\{N,\gamma\}}$  before any reproduction over edge  $v,v'$  with probability of at least:  $1-O(1/N^2)1-O(1/N^2)$ .”

**Answer:** We rephrased the statement (pretty much) as suggested.

Page 6 – “The sum of these probabilities is at most  $2\epsilon/N^7$ ”. Where was the factor of  $2$  obtained from?

**Answer:** The idea is that two terms are being summed and the second one is less than the first one. Possibly the confusion was that there was another typo – a factor of  $r$  was missing. We have now fixed that too.

Page 8 – “...from Lemma 8 (if the edge is used).” should mention Lemma 9 instead.

**Answer:** Fixed.

Page 8 – “mutants do not fixate in  $A^{\text{dB}}_{\{\gamma N\}}$ ” should instead mention  $A^{\text{Bd}}_{\{(1-\gamma) N\}}$ ”.

**Answer:** Fixed.

Page 8/9 – When stating theorems 3 and 4, there is a repetition of “graph  $A_{\{N, \gamma\}}$ ,” in the text that should be removed.

**Answer:** Fixed.

Page 9 – There are dot product symbols missing between  $1.00001X$  in three lines of the last equation.

**Answer:** Fixed.
